# Supplementary material
Source: PubMed Central journal article supplement (PMC4288906)
Supplement: IAI.02617-14_zii999091032so1.pdf [file IAI.02617-14_zii999091032so1.pdf]

1 Supplemental Figures

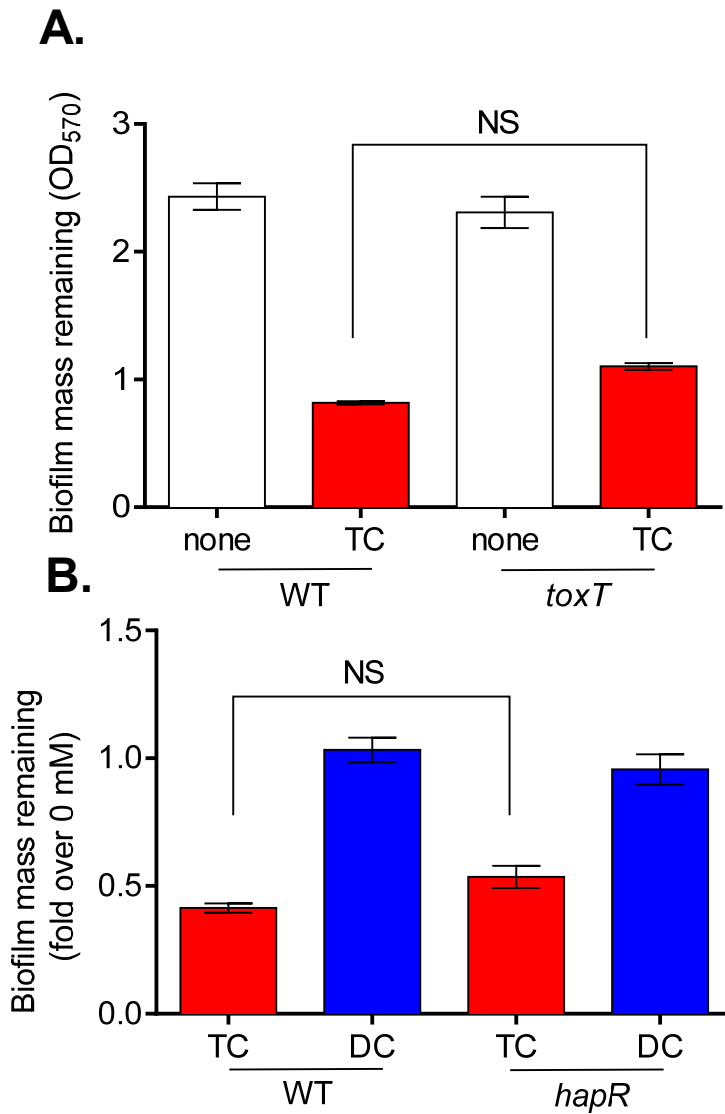

2  
3 **Figure S1.** The effects of virulence gene expression and quorum sensing on biofilm dispersal. **A.**  
4 Detachment of WT and  $\Delta toxT$  mutant strains in the presence of TC or DC, in which remaining  
5 biofilm mass is quantified by CV staining. **B.** Detachment of WT and  $\Delta hapR$  mutant strains in  
6 the presence of TC or DC, in which remaining biofilm mass is quantified by CV staining. As  
7  $\Delta hapR$  strains form thicker biofilms, data are presented as fold change over the no supplement  
8 condition. Statistical significance reported as NS: no significance.

9  
10

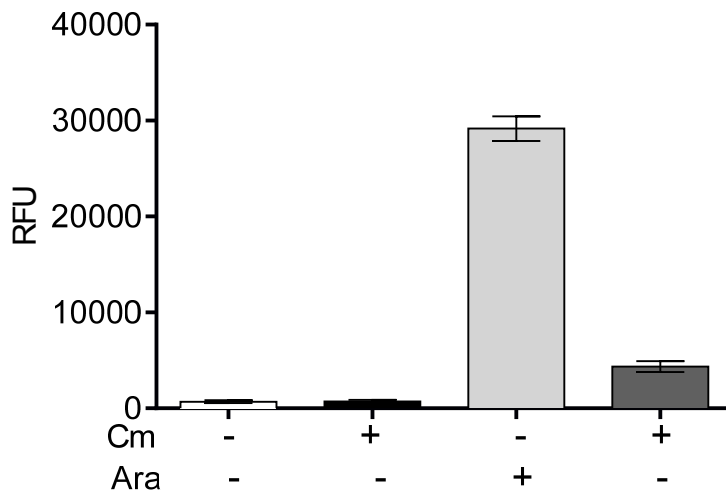

1  
2 **Figure S2.** Effects of chloramphenicol on protein synthesis. *V. cholerae* harboring pBAD-GFP  
3 vector was inoculated into glass tubes and allowed to form biofilms for 24 hours at 22°C.  
4 Biofilms were incubated with the protein-synthesis inhibitor chloramphenicol (Cm) and 0.1%  
5 arabinose for two hours. Biofilms were washed with PBS, manually disrupted, and fluorescence  
6 measured. Fluorescence was normalized to OD<sub>600</sub> and reported in relative fluorescence units  
7 (RFU). Data are means and s.d. of three independent experiments.  
8  
9

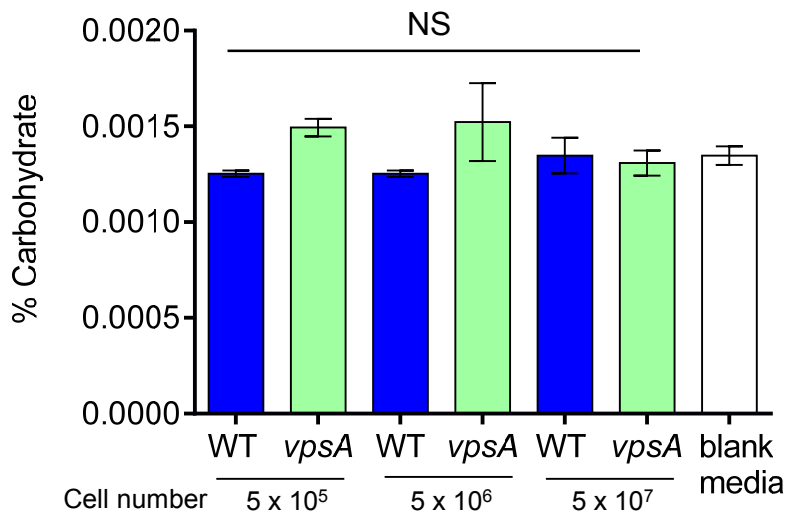

1  
 2  
 3 **Figure S3.** Contribution of cell lysis to carbohydrate content measured. 1 mL of mid-log culture  
 4 of wild type or  $\Delta vpsA$  *V. cholerae* was pelleted and resuspended in 1 mL of M9 minimal media +  
 5 0.2% glycerol then diluted 10, 100, or 1000-fold into 1mL of media. Aliquots were serially  
 6 diluted and plated to quantify bacterial concentration. Samples were sterilized through 0.2  $\mu$ M  
 7 filters and carbohydrate content of filtrate was estimated using a modified phenol-sulfuric acid  
 8 method. Data are means and s.d. of three independent experiments. Statistical significance  
 9 reported as NS: no significance.

10  
11

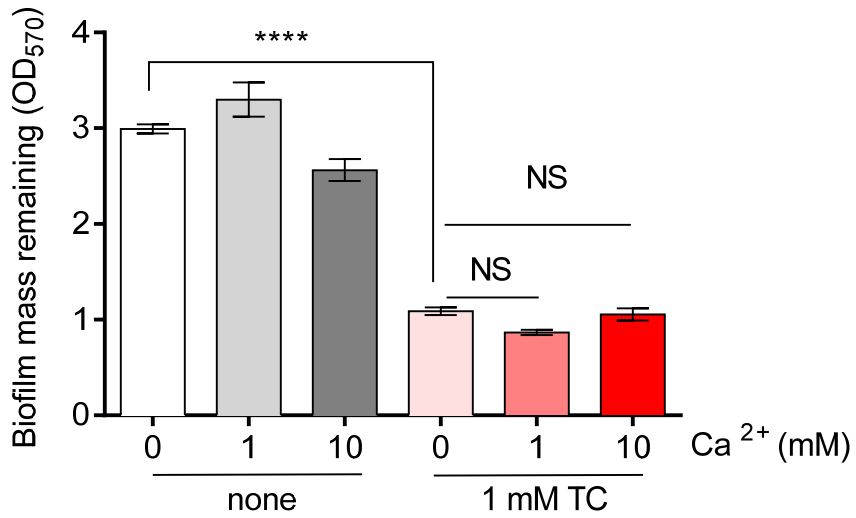

1

2 **Figure S4.** The effects of Ca<sup>2+</sup> on biofilm dispersal. Detachment of WT *V. cholerae* in the  
 3 presence of Ca<sup>2+</sup> and TC as measured by biofilm mass remaining. Data are means and s.d. of  
 4 three independent experiments. Statistical significance reported as NS: no significance; \*\*\*\*: P<  
 5 0.0001.

6

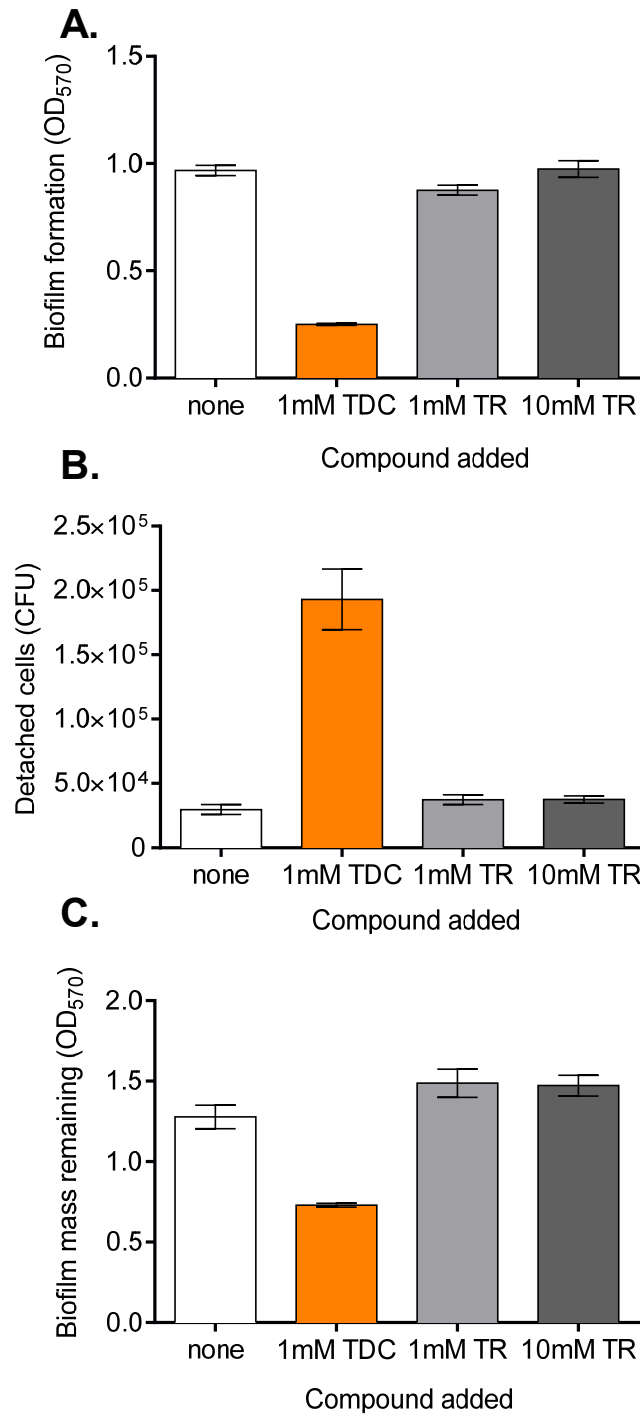

1  
 2 **Figure S5.** The effect of taurine and TDC on *V. cholerae* biofilm dispersal. **A.** *V. cholerae* was  
 3 inoculated into glass tubes and allowed to form biofilms for 24 hours at 22°C. Biofilms of  
 4 cultures grown in the presence of taurodeoxycholate (TDC), or taurine (TR) were quantified with  
 5 crystal violet staining and data are presented in OD<sub>570</sub> values. **B and C.** Detached cells and  
 6 remaining biofilm mass when mature biofilms were incubated in the presence of 1mM TDC,  
 7 1mM TR or 10 mM TR for two hours. Data are means and s.d. of three independent experiments.
